# Supplementary material
Source: publisher figshare collection journal article supplement (https://tandf.figshare.com/articles/dataset/_/7533005)

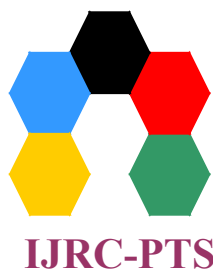

## Supplementary Information

### **Distribution, source and ecological risk assessment of parent and alkylated PAHs in coastal environment of Dalian, China after oil spill**

Wen-Jun Hong<sup>1,2</sup>, Hongliang Jia<sup>2</sup>, Yeqing Sun<sup>3\*</sup>, Xianjie Liu<sup>4</sup>, Luo Wang<sup>4</sup>, Yi-Fan Li<sup>5,2\*</sup>

<sup>1</sup>*Zhejiang Scientific Research Institute of Transport, Hangzhou 311305, China*

<sup>2</sup>*International Joint Research Center for Persistent Toxic Substances (IJRC-PTS), Dalian Maritime University, Dalian 116026, China*

<sup>3</sup>*Institute of Environmental Systems Biology, Dalian Maritime University, Dalian 116026, China*

<sup>4</sup>*Dalian Ocean University, Dalian 116023, China*

<sup>5</sup>*IJRC-PTS, State Key Laboratory of Urban Water Resource and Environment, Harbin Institute of Technology, Harbin 150090, China*

*\*Corresponding author phone:*

*Yeqing Sun: tel: 86-411-8472-5675; fax: 86-411-8472-5675;*

*E-mail: yqsun@dlmu.edu.cn*

*Yi-Fan Li: tel: 86-411-8472-8489; fax: 86-411-8472-8489;*

*E-mail: ijrc\_pts\_paper@yahoo.com*

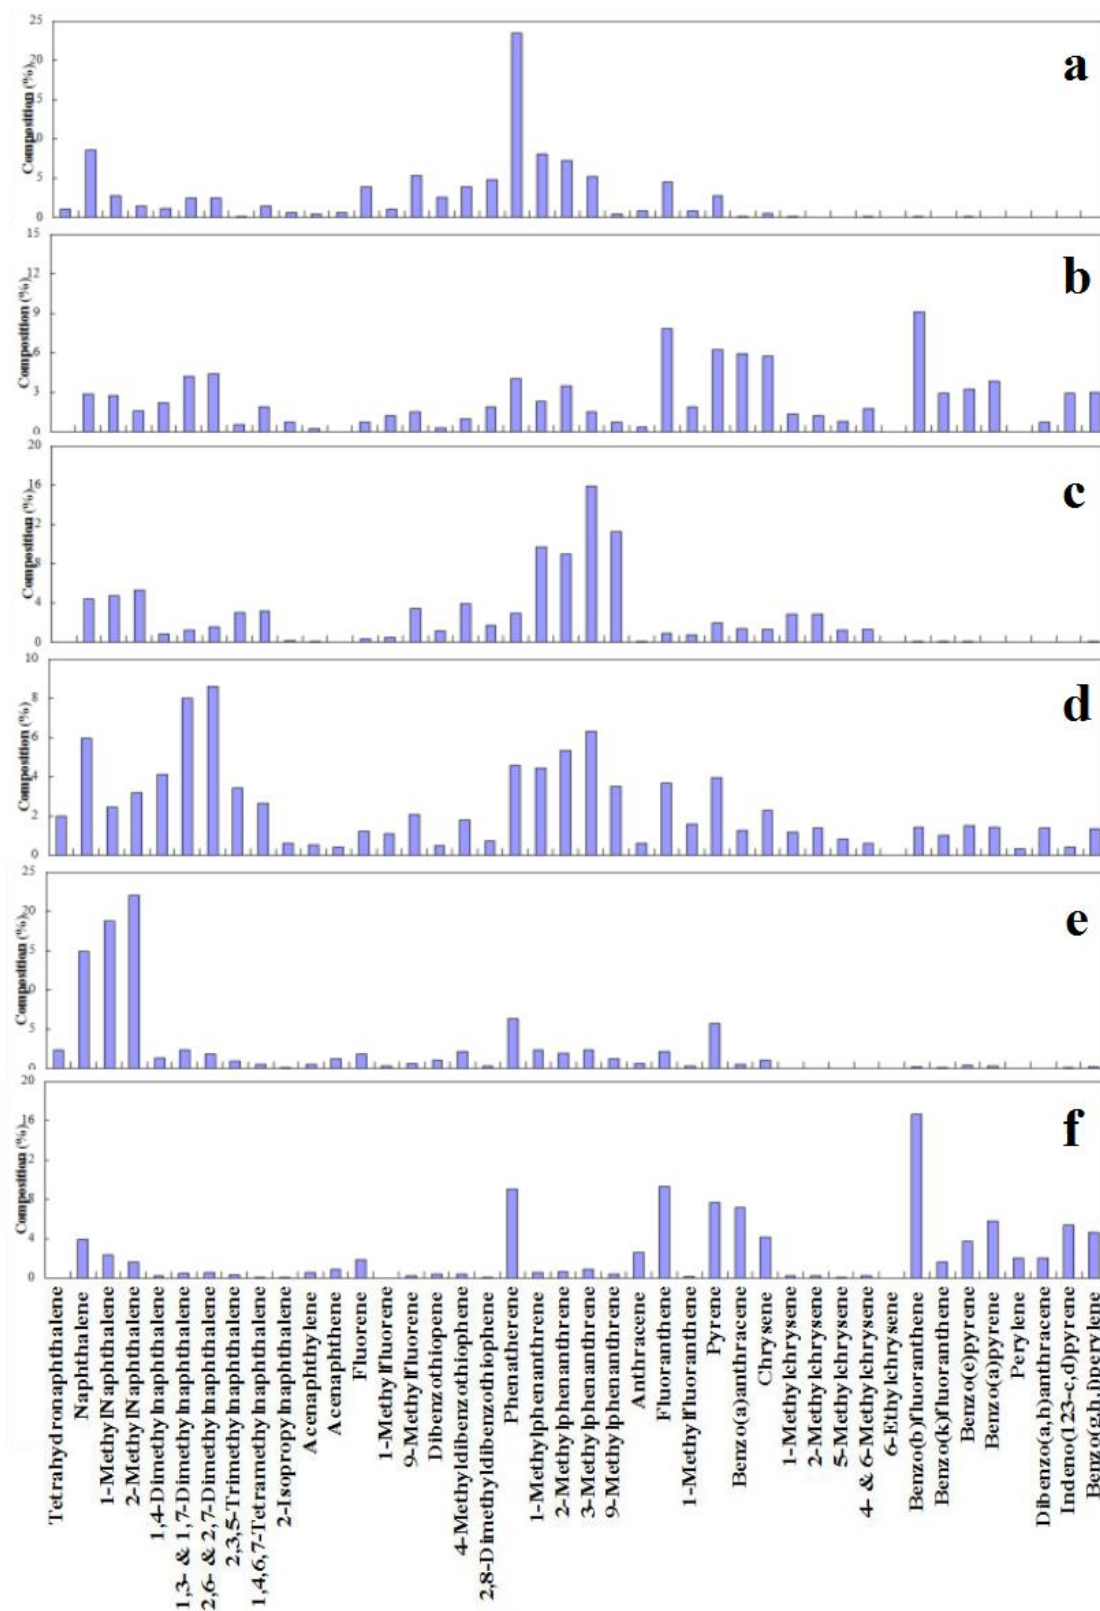

**Figure S1.** Compositions of 45 PAH congeners in multi-matrices in Dalian: a, gaseous phase; b, particle phase; c, crude oil; d, surface runoff; e, effluent of wastewater treatment plants; f, surface sediment.

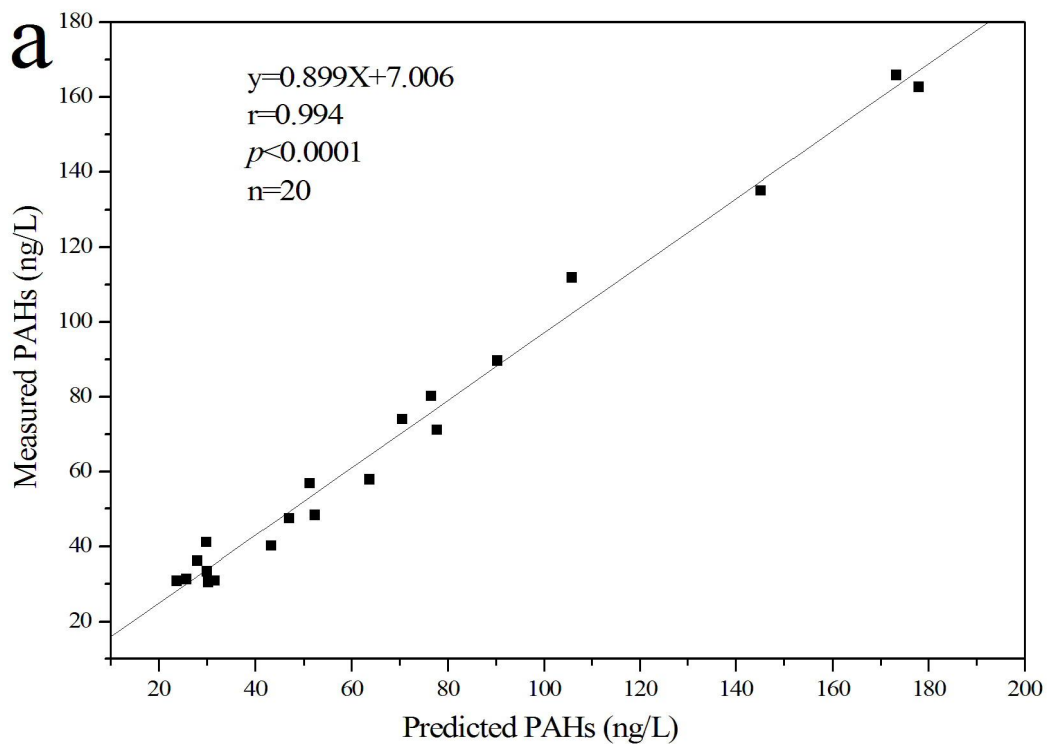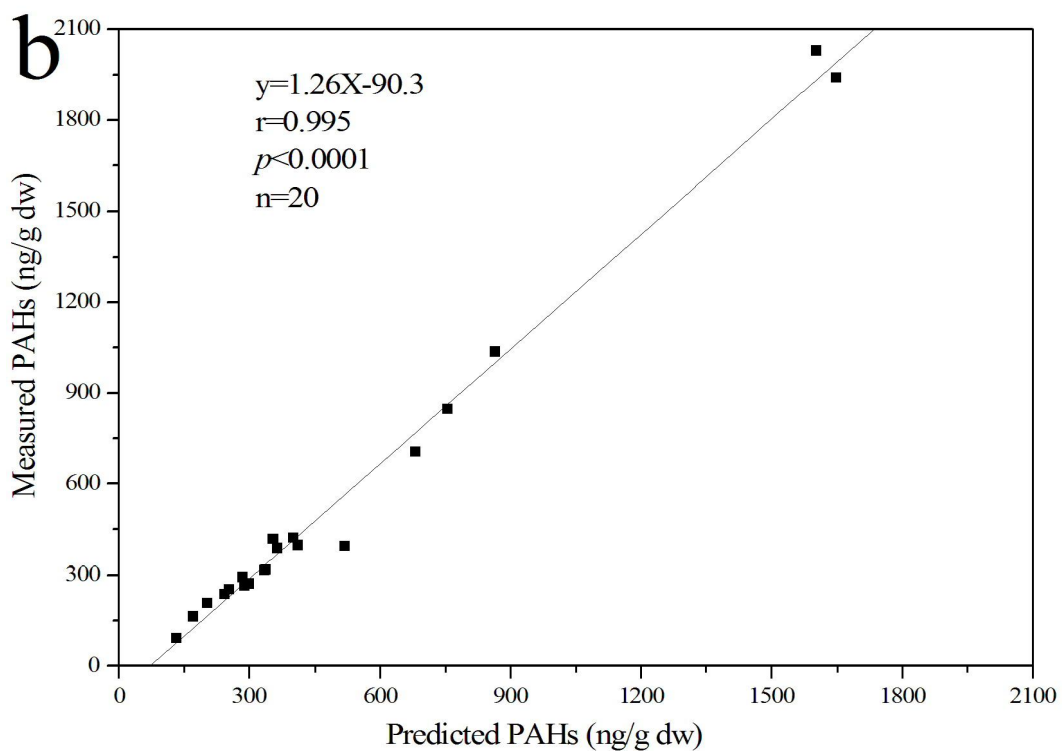

**Figure S2.** Comparison of measured and predicted PAHs concentrations obtained by PCA-MLR, (a) seawater, (b) sediment.

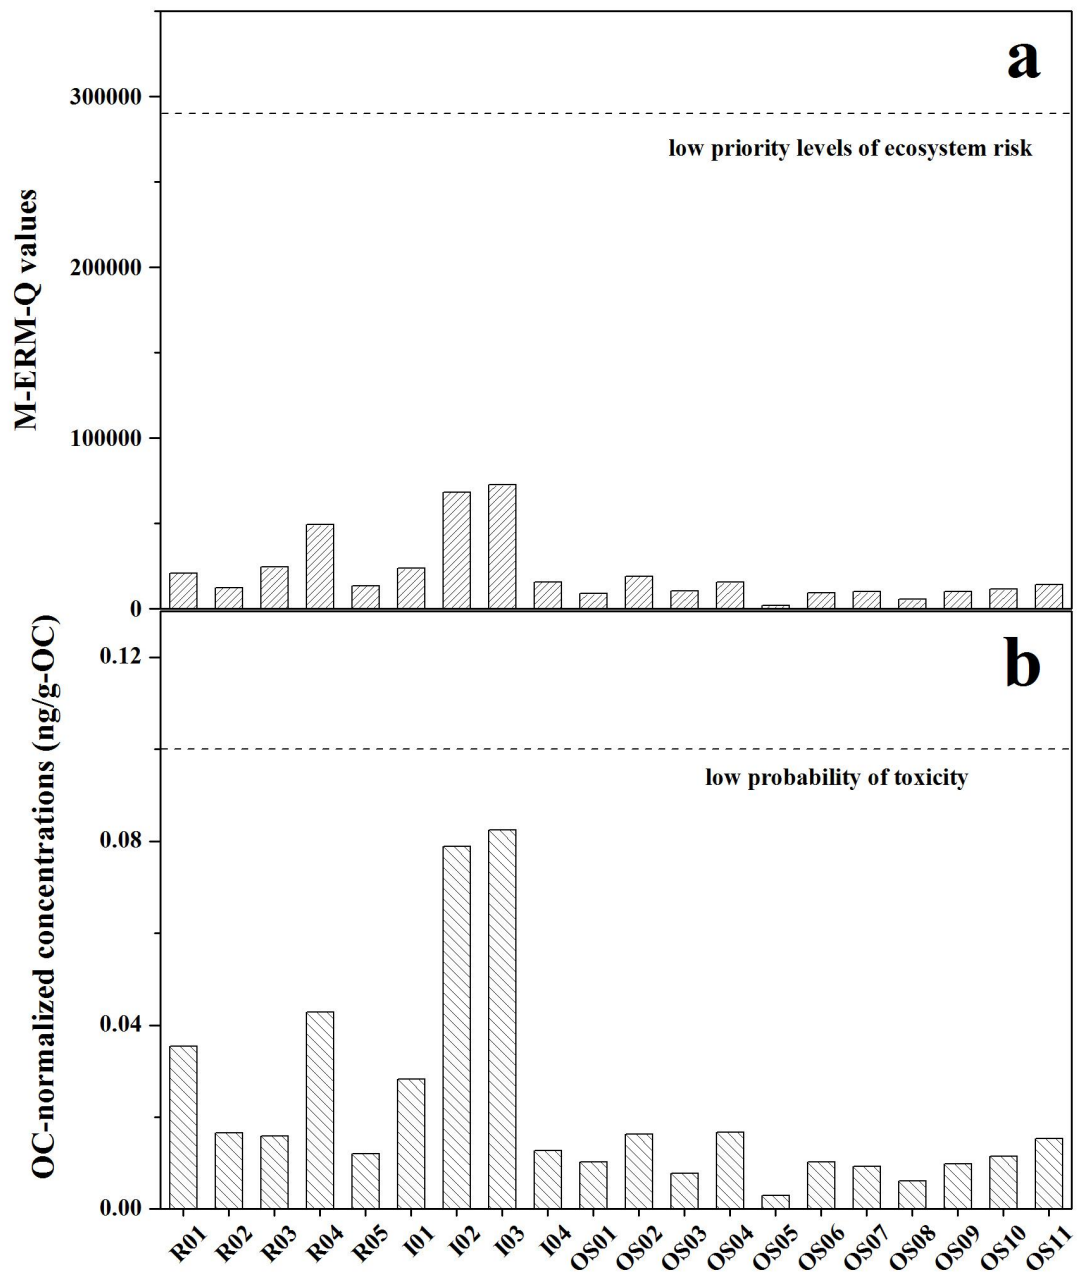

**Figure S3.** The OC-normalized concentrations (a) and M-ERM-Q values (b) of PAHs at different stations from coastal areas of Dalian.

**Table S1** Some basic information for the five municipal sewage treatment plants.

| Plant | Sewage treatment process                  | Sewage fate after treatment (Effluent fate) | Treatment capacity (10 <sup>3</sup> t/day) |
|-------|-------------------------------------------|---------------------------------------------|--------------------------------------------|
| Sew01 | Cyclic Activated Sludge Technology (CAST) | Into the sea                                | 70                                         |
| Sew02 | Biological Aerated Filter                 | Into the sea                                | 120                                        |
| Sew03 | Biological Aerated Filter                 | Into the sea                                | 120                                        |
| Sew04 | Anaerobic/Oxic                            | Into the sea                                | 10                                         |
| Sew05 | Cyclic Activated Sludge Technology (CAST) | Into the sea                                | 80                                         |

**Table S2** Method detection limits values for parent- and alkyl-PAHs.

| PAHs                           | Sample type | Water<br>(pg/L) | Sediment<br>(pg/g dry<br>weight) | Gaseous<br>phases<br>(pg/m <sup>3</sup> ) | Particle<br>phases<br>(pg/m <sup>3</sup> ) |
|--------------------------------|-------------|-----------------|----------------------------------|-------------------------------------------|--------------------------------------------|
| Tetrahydronaphthalene          |             | 155             | 31                               | 0.15                                      | 0.13                                       |
| Naphthalene                    |             | 199             | 40                               | 0.79                                      | 0.78                                       |
| 1-MethylNaphthalene            |             | 363             | 73                               | 1.4                                       | 1.4                                        |
| 2-MethylNaphthalene            |             | 367             | 73                               | 1.4                                       | 1.4                                        |
| 1,3- & 1,7-Dimethylnaphthalene |             | 429             | 86                               | 2.4                                       | 2.5                                        |
| 1,4-Dimethylnaphthalene        |             | 608             | 122                              | 1.7                                       | 1.7                                        |
| 2,6- & 2,7-Dimethylnaphthalene |             | 542             | 108                              | 2.2                                       | 2.2                                        |
| 2,3,5-Trimethylnaphthalene     |             | 203             | 41                               | 0.81                                      | 0.80                                       |
| 1,4,6,7-Tetramethylnaphthalene |             | 181             | 36                               | 0.73                                      | 0.71                                       |
| 2-Isopropylnaphthalene         |             | 257             | 51                               | 1.0                                       | 1.0                                        |
| Acenaphthylene                 |             | 342             | 68                               | 1.4                                       | 1.4                                        |
| Acenaphthene                   |             | 189             | 38                               | 0.75                                      | 0.70                                       |
| Fluorene                       |             | 391             | 78                               | 1.6                                       | 1.6                                        |
| 1-Methylfluorene               |             | 379             | 76                               | 1.5                                       | 1.5                                        |
| 9-Methylfluorene               |             | 494             | 99                               | 2.0                                       | 2.0                                        |
| Dibenzothiopene                |             | 12              | 2                                | 0.10                                      | 0.11                                       |
| 4-Methyldibenzothiophene       |             | 954             | 191                              | 3.8                                       | 3.8                                        |
| 2,8-Dimethyldibenzothiophene   |             | 328             | 66                               | 1.3                                       | 1.3                                        |
| Phenanthrene                   |             | 529             | 106                              | 2.1                                       | 2.1                                        |
| 1-Methylphenanthrene           |             | 898             | 180                              | 3.6                                       | 3.6                                        |
| 2-Methylphenanthrene           |             | 675             | 135                              | 2.7                                       | 2.7                                        |
| 3-Methylphenanthrene           |             | 1047            | 209                              | 4.0                                       | 4.0                                        |
| 9-Methylphenanthrene           |             | 582             | 116                              | 2.4                                       | 2.4                                        |
| Anthracene                     |             | 365             | 73                               | 1.5                                       | 1.5                                        |
| Fluoranthene                   |             | 167             | 33                               | 0.67                                      | 0.69                                       |
| 1-Methylfluoranthene           |             | 353             | 71                               | 1.4                                       | 1.4                                        |
| Pyrene                         |             | 196             | 39                               | 0.78                                      | 0.75                                       |
| Benzo(a)anthracene             |             | 139             | 28                               | 0.56                                      | 0.51                                       |
| Chrysene                       |             | 105             | 21                               | 0.42                                      | 0.40                                       |
| 1-Methylchrysene               |             | 1160            | 231                              | 4.6                                       | 4.6                                        |
| 2-Methylchrysene               |             | 1020            | 204                              | 4.1                                       | 4.1                                        |
| 4- & 6-Methylchrysene          |             | 997             | 199                              | 6.3                                       | 6.3                                        |
| 5-Methylchrysene               |             | 1580            | 316                              | 4.0                                       | 4.0                                        |
| 6-Ethylchrysene                |             | 1280            | 255                              | 5.1                                       | 5.1                                        |
| Benzo(b)fluoranthene           |             | 405             | 81                               | 1.6                                       | 1.6                                        |
| Benzo(k)fluoranthene           |             | 405             | 81                               | 1.6                                       | 1.6                                        |
| Benzo(e)pyrene                 |             | 624             | 125                              | 2.5                                       | 2.5                                        |
| Benzo(a)pyrene                 |             | 639             | 128                              | 2.6                                       | 2.6                                        |
| Perylene                       |             | 525             | 105                              | 2.1                                       | 2.0                                        |
| Indeno(123-c,d)pyrene          |             | 89              | 18                               | 3.5                                       | 3.5                                        |
| Dibenzo(a,h)anthracene         |             | 89              | 18                               | 3.5                                       | 3.5                                        |
| Benzo(g,h,i)perylene           |             | 116             | 23                               | 4.6                                       | 4.6                                        |

**Table S3** Summary of PAHs concentrations in surface water (ng/L).

| Chemical                       | Maximum | Minimum | Mean  | SD    | Detection rate (%) |
|--------------------------------|---------|---------|-------|-------|--------------------|
| 1-Methylnaphthalene            | 31.7    | 2.27    | 9.85  | 8.72  | 100                |
| 2-Methylnaphthalene            | 30.1    | 3.84    | 11.9  | 8.13  | 100                |
| 1,4-Dimethylnaphthalene        | 6.74    | 1.36    | 3.18  | 1.80  | 45                 |
| 1,3- & 1,7-Dimethylnaphthalene | 5.83    | 1.06    | 2.40  | 1.39  | 100                |
| 2,6- & 2,7-Dimethylnaphthalene | 1.73    | BDL     | 0.430 | 0.565 | 100                |
| 2,3,5-Trimethylnaphthalene     | 4.32    | 0.258   | 1.01  | 0.859 | 100                |
| 1,4,6,7-Tetramethylnaphthalene | 0.776   | BDL     | 0.116 | 0.226 | 25                 |
| 2-Isopropylnaphthalene         | 2.17    | BDL     | 0.603 | 0.509 | 85                 |
| 1-Methylfluorene               | 1.26    | BDL     | 0.308 | 0.360 | 50                 |
| 9-Methylfluorene               | 1.11    | BDL     | 0.184 | 0.345 | 25                 |
| 4-Methyldibenzothiophene       | 7.61    | BDL     | 0.912 | 1.72  | 45                 |
| 2,8-Dimethyldibenzothiophene   | 0.34    | BDL     | 0.017 | 0.075 | 5                  |
| 1-Methylphenanthrene           | 1.26    | BDL     | 0.063 | 0.283 | 5                  |
| 2-Methylphenanthrene           | 1.19    | BDL     | 0.338 | 0.483 | 35                 |
| 3-Methylphenanthrene           | 3.06    | BDL     | 0.153 | 0.684 | 5                  |
| 9-Methylphenanthrene           | 1.85    | BDL     | 0.479 | 0.639 | 40                 |
| 1-Methylfluoranthene           | 1.16    | BDL     | 0.249 | 0.322 | 40                 |
| 1-Methylchrysene               | BDL     | BDL     | -     | -     | 0                  |
| 2-Methylchrysene               | BDL     | BDL     | -     | -     | 0                  |
| 5-Methylchrysene               | BDL     | BDL     | -     | -     | 0                  |
| 4- & 6-Methylchrysene          | 4.67    | BDL     | 0.536 | 1.22  | 20                 |
| 6-Ethylchrysene                | 3.45    | BDL     | 0.173 | 0.772 | 5                  |
| $\Sigma_{25}$ alkyl-PAHs       | 79.8    | 12.5    | 32.9  | 22.4  | -                  |

**Table S4** Summary of PAHs concentrations in surface sediment (ng/g dw).

| Chemical                       | Maximum | Minimum | Mean  | SD    | Detection rate (%) |
|--------------------------------|---------|---------|-------|-------|--------------------|
| 1-Methylnaphthalene            | 37.1    | 2.74    | 13.2  | 10.2  | 100                |
| 2-Methylnaphthalene            | 21.4    | 3.35    | 8.99  | 5.02  | 100                |
| 1,4-Dimethylnaphthalene        | 6.77    | 1.64    | 3.36  | 1.43  | 100                |
| 1,3- & 1,7-Dimethylnaphthalene | 6.08    | 1.22    | 2.67  | 1.40  | 100                |
| 2,6- & 2,7-Dimethylnaphthalene | 4.68    | 0.538   | 1.41  | 0.939 | 100                |
| 2,3,5-Trimethylnaphthalene     | 4.02    | 0.818   | 1.62  | 0.906 | 100                |
| 1,4,6,7-Tetramethylnaphthalene | 1.37    | 0.264   | 0.575 | 0.288 | 100                |
| 2-Isopropyl-naphthalene        | 0.470   | 0.100   | 0.256 | 0.114 | 100                |
| 1-Methylfluorene               | 0.576   | 0.0498  | 0.215 | 0.146 | 100                |
| 9-Methylfluorene               | 2.77    | 0.661   | 1.41  | 0.523 | 100                |
| 4-Methyldibenzothiophene       | 7.96    | 0.420   | 2.172 | 1.57  | 100                |
| 2,8-Dimethyldibenzothiophene   | 2.38    | 0.0900  | 0.270 | 0.500 | 100                |
| 1-Methylphenanthrene           | 10.7    | 1.06    | 3.01  | 2.13  | 100                |
| 2-Methylphenanthrene           | 11.7    | 1.56    | 3.73  | 2.52  | 100                |
| 3-Methylphenanthrene           | 15.5    | 2.16    | 5.10  | 3.99  | 100                |
| 9-Methylphenanthrene           | 6.59    | 0.794   | 2.13  | 1.36  | 100                |
| 1-Methylfluoranthene           | 2.98    | 0.272   | 0.905 | 0.771 | 100                |
| 1-Methylchrysene               | 5.26    | 0.291   | 1.35  | 1.36  | 100                |
| 2-Methylchrysene               | 5.40    | 0.440   | 1.53  | 1.26  | 100                |
| 5-Methylchrysene               | 3.09    | 0.000   | 0.610 | 0.715 | 80                 |
| 4- & 6-Methylchrysene          | 4.27    | 0.297   | 1.19  | 1.11  | 100                |
| 6-Ethylchrysene                | 1.62    | BDL     | 0.199 | 0.383 | 40                 |
| $\Sigma_{25}$ alkyl-PAHs       | 156     | 22.2    | 55.9  | 34.8  | -                  |



**Table S5** Concentrations of alkyl-PAHs in sediment (ng/g dw) from different locations around world.

| Location                                 | Year      | Sampling number | Concentration   | Reference            |
|------------------------------------------|-----------|-----------------|-----------------|----------------------|
| Spanish river                            | 2003      | 36              | 13-13564 (1530) | Planas et al., 2003  |
| Rural, Laos                              | 2005      | 4               | 6-11 (8)        | Saha et al., 2009    |
| Urban, Laos                              | 2005      | 5               | 187-1007 (439)  |                      |
| Rural, Cambodia                          | 2004      | 15              | 3-213 (38)      |                      |
| Urban, Cambodia                          | 2004      | 4               | 221-2382 (1311) |                      |
| Rural, Vientam                           | 2004      | 6               | 8-122 (41)      |                      |
| Urban, Vientam                           | 2000-2004 | 13              | 25-2997 (786)   |                      |
| Rural, Thailand                          | 2003      | 18              | 2-34 (17)       |                      |
| Urban, Thailand                          | 2003      | 17              | 28-821 (306)    |                      |
| Rural, Philippines                       | 2002      | 4               | 1-98 (34)       |                      |
| Urban, Philippines                       | 2002      | 6               | 205-2287 (781)  |                      |
| Rural, Indonesia                         | 1998      | 6               | 3-109 (35)      |                      |
| Urban, Indonesia                         | 2000      | 4               | 514-2733 (1807) |                      |
| Rural, Malaysia                          | 1998-1999 | 17              | 0-9 (3)         |                      |
| Urban, Malaysia                          | 1998-2004 | 17              | 6-217 (100)     |                      |
| Rural, India                             | 2002-2006 | 21              | 6-41 (17)       |                      |
| Urban, India                             | 2003-2006 | 17              | 12-6680 (1679)  |                      |
| Urban, Japan                             | 2005-2006 | 24              | 53-2538 (521)   |                      |
| Osaka Bay, Japan                         | 2000-2006 | 44              | 13.7-1700       |                      |
| Mohang Harbor, South Korea               | 2009      | 8               | 10.5-331 (221)  | Kim et al., 2014     |
| The eastern coast of Qatar, Arabian Gulf | 2012      | 16              | 0.6-988 (96.7)  | Soliman et al., 2014 |

**Table S6** Summary of PAHs concentrations in air (ng/m<sup>3</sup>).

| Chemical                       | Gaseous phase (ng/m <sup>3</sup> ) |        |        | Particle phase (ng/m <sup>3</sup> ) |         |         |
|--------------------------------|------------------------------------|--------|--------|-------------------------------------|---------|---------|
|                                | GP01                               | GP02   | GP03   | PP01                                | PP02    | PP03    |
| Tetrahydronaphthalene          | 0.238                              | 0.246  | 0.237  | BDL                                 | BDL     | BDL     |
| Naphthalene                    | 2.22                               | 1.79   | 1.87   | 0.0574                              | 0.0294  | 0.0498  |
| 1-Methylnaphthalene            | 1.02                               | 0.418  | 0.486  | 0.0653                              | 0.0339  | 0.0345  |
| 2-Methylnaphthalene            | 0.543                              | 0.213  | 0.244  | 0.0297                              | 0.0122  | 0.0339  |
| 1,4-Dimethylnaphthalene        | 0.531                              | 0.107  | 0.155  | 0.0388                              | 0.0279  | 0.0399  |
| 1,3- & 1,7-Dimethylnaphthalene | 1.13                               | 0.251  | 0.332  | 0.0736                              | 0.0460  | 0.0828  |
| 2,6- & 2,7-Dimethylnaphthalene | 1.14                               | 0.228  | 0.294  | 0.0739                              | 0.0504  | 0.0865  |
| 2,3,5-Trimethylnaphthalene     | 0.0381                             | 0.0121 | 0.0153 | 0.00736                             | 0.00672 | 0.0144  |
| 1,4,6,7-Tetramethylnaphthalene | 0.571                              | 0.137  | 0.257  | 0.0345                              | 0.0225  | 0.0334  |
| 2-Isopropylnaphthalene         | 0.248                              | 0.0753 | 0.125  | 0.0126                              | 0.0109  | 0.0128  |
| Acenaphthylene                 | 0.198                              | 0.0589 | 0.0625 | 0.00553                             | 0.00132 | 0.00602 |
| Acenaphthene                   | 0.313                              | 0.0408 | 0.0746 | BDL                                 | BDL     | BDL     |
| Fluorene                       | 1.51                               | 0.447  | 0.663  | 0.0121                              | 0.0101  | 0.0145  |
| 1-Methylfluorene               | 0.451                              | 0.111  | 0.159  | 0.0235                              | 0.0167  | 0.0188  |
| 9-Methylfluorene               | 2.09                               | 0.615  | 0.903  | 0.0384                              | 0.0168  | 0.0198  |
| Dibenzothiophene               | 0.971                              | 0.381  | 0.415  | 0.00661                             | 0.00404 | 0.00567 |
| 4-Methyldibenzothiophene       | 1.61                               | 0.496  | 0.564  | 0.0223                              | 0.0116  | 0.0125  |
| 2,8-Dimethyldibenzothiophene   | 1.83                               | 0.670  | 0.786  | 0.0452                              | 0.0240  | 0.0229  |
| Phenathrene                    | 8.51                               | 3.66   | 3.82   | 0.0808                              | 0.0454  | 0.0688  |
| 1-Methylphenanthrene           | 2.96                               | 1.18   | 1.36   | 0.0637                              | 0.0291  | 0.0198  |
| 2-Methylphenanthrene           | 2.74                               | 1.05   | 1.18   | 0.101                               | 0.0350  | 0.0326  |
| 3-Methylphenanthrene           | 1.99                               | 0.737  | 0.841  | 0.0380                              | 0.0151  | 0.0194  |
| 9-Methylphenanthrene           | 0.157                              | 0.0739 | 0.0953 | 0.0125                              | 0.0133  | 0.0114  |
| Anthracene                     | 0.203                              | 0.192  | 0.202  | 0.00569                             | 0.00662 | 0.00530 |
| Fluoranthene                   | 1.71                               | 0.693  | 0.652  | 0.139                               | 0.114   | 0.120   |
| 1-Methylfluoranthene           | 0.239                              | 0.145  | 0.157  | 0.0419                              | 0.0305  | 0.0180  |

| Chemical                   | Gaseous phase (ng/m <sup>3</sup> ) |         |         | Particle phase (ng/m <sup>3</sup> ) |         |        |
|----------------------------|------------------------------------|---------|---------|-------------------------------------|---------|--------|
|                            | GP01                               | GP02    | GP03    | PP01                                | PP02    | PP03   |
| Pyrene                     | 1.17                               | 0.399   | 0.359   | 0.110                               | 0.0971  | 0.0921 |
| Benzo(a)anthracene         | 0.0328                             | 0.0202  | 0.0363  | 0.107                               | 0.0849  | 0.092  |
| Chrysene                   | 0.147                              | 0.0748  | 0.111   | 0.109                               | 0.0811  | 0.0859 |
| 1-Methylchrysene           | 0.0275                             | 0.0277  | 0.0273  | 0.0334                              | 0.0165  | 0.0161 |
| 2-Methylchrysene           | 0.0114                             | 0.0138  | 0.0191  | 0.0162                              | 0.00906 | 0.0354 |
| 5-Methylchrysene           | 0.0150                             | 0.0135  | 0.0148  | 0.0141                              | 0.0123  | 0.0124 |
| 4- & 6-Methylchrysene      | 0.0254                             | 0.0218  | 0.0384  | 0.0559                              | 0.0122  | 0.0124 |
| 6-Ethylchrysene            | BDL                                | BDL     | BDL     | BDL                                 | BDL     | BDL    |
| Benzo(b)flouranthene       | 0.0371                             | 0.0182  | 0.0241  | 0.177                               | 0.127   | 0.131  |
| Benzo(k)flouranthene       | 0.0249                             | 0.0119  | 0.0136  | 0.0586                              | 0.0416  | 0.0397 |
| Benzo(e)pyrene             | 0.0247                             | 0.0128  | 0.0186  | 0.0624                              | 0.0480  | 0.0460 |
| Benzo(a)pyrene             | 0.0229                             | 0.0132  | 0.0141  | 0.0691                              | 0.0532  | 0.0632 |
| Perylene                   | BDL                                | BDL     | BDL     | BDL                                 | BDL     | BDL    |
| Dibenzo(a,h)anthracene     | 0.00754                            | 0.00791 | 0.0173  | 0.0151                              | 0.00851 | 0.0116 |
| Indeno(123-c,d)pyrene      | 0.0312                             | 0.0122  | 0.00656 | 0.0781                              | 0.0309  | 0.0318 |
| Benzo(g,h,i)perylene       | 0.0257                             | 0.0115  | 0.0134  | 0.0816                              | 0.0334  | 0.0296 |
| Σ <sub>16</sub> EPA-PAHs   | 16.2                               | 7.45    | 7.94    | 1.11                                | 0.764   | 0.841  |
| Σ <sub>25</sub> alkyl-PAHs | 19.4                               | 6.60    | 8.05    | 0.841                               | 0.455   | 0.592  |
| Σ <sub>45</sub> PAHs       | 36.8                               | 14.7    | 16.7    | 2.02                                | 1.27    | 1.49   |

**Table S7** Summary of PAHs concentrations (ng/g dw) in Crude oil and Oil dispersant (ng/mL).

| Chemical                       | Crude oil (ng/g dw) |      |      | Oil dispersant (ng/mL) |       |       |
|--------------------------------|---------------------|------|------|------------------------|-------|-------|
|                                | CO01                | CO02 | CO03 | OD01                   | OD02  | OD03  |
| Tetrahydronaphthalene          | BDL                 | BDL  | BDL  | BDL                    | BDL   | BDL   |
| Naphthalene                    | 490                 | 486  | 490  | BDL                    | BDL   | BDL   |
| 1-Methylnaphthalene            | 496                 | 494  | 578  | 3.29                   | 3.56  | 3.25  |
| 2-Methylnaphthalene            | 622                 | 520  | 624  | 9.96                   | 11.1  | 10.6  |
| 1,4-Dimethylnaphthalene        | 92.6                | 77.6 | 96.0 | 14.4                   | 14.5  | 14.6  |
| 1,3- & 1,7-Dimethylnaphthalene | 138                 | 131  | 151  | 15.5                   | 16.2  | 16.1  |
| 2,6- & 2,7-Dimethylnaphthalene | 179                 | 159  | 172  | 14.4                   | 13.9  | 14.0  |
| 2,3,5-Trimethylnaphthalene     | 286                 | 346  | 378  | 5.19                   | 4.48  | 5.42  |
| 1,4,6,7-Tetramethylnaphthalene | 396                 | 302  | 344  | 5.52                   | 5.15  | 5.26  |
| 2-Isopropyl naphthalene        | 19.0                | 25.8 | 19.9 | BDL                    | BDL   | BDL   |
| Acenaphthylene                 | 10.5                | 10.4 | 11.2 | BDL                    | BDL   | BDL   |
| Acenaphthene                   | BDL                 | BDL  | BDL  | BDL                    | BDL   | BDL   |
| Fluorene                       | 41.6                | 39   | 41.6 | 0.276                  | 0.377 | 0.276 |
| 1-Methylfluorene               | 58.6                | 45.8 | 55.2 | 4.51                   | 4.02  | 4.16  |
| 9-Methylfluorene               | 412                 | 356  | 380  | 4.60                   | 3.99  | 4.36  |
| Dibenzothiophene               | 129                 | 121  | 127  | 0.501                  | 0.389 | 0.448 |
| 4-Methyldibenzothiophene       | 448                 | 424  | 432  | BDL                    | BDL   | BDL   |
| 2,8-Dimethyldibenzothiophene   | 202                 | 191  | 185  | 5.54                   | 5.89  | 5.57  |
| Phenathrene                    | 344                 | 300  | 328  | 1.98                   | 1.60  | 1.81  |
| 1-Methylphenanthrene           | 1060                | 1074 | 1060 | 2.10                   | 1.81  | 2.05  |
| 2-Methylphenanthrene           | 1066                | 948  | 962  | 4.56                   | 3.48  | 3.90  |
| 3-Methylphenanthrene           | 1770                | 1670 | 1800 | 3.12                   | 3.03  | 3.13  |
| 9-Methylphenanthrene           | 1240                | 1210 | 1250 | 3.43                   | 3.33  | 3.89  |
| Anthracene                     | 14.5                | 14.8 | 16.4 | 1.88                   | 1.65  | 1.97  |
| Fluoranthene                   | 105                 | 101  | 99.8 | 3.25                   | 2.60  | 3.13  |

| Chemical                 | Crude oil (ng/g dw) |       |       | Oil dispersant (ng/mL) |      |      |
|--------------------------|---------------------|-------|-------|------------------------|------|------|
|                          | CO01                | CO02  | CO03  | OD01                   | OD02 | OD03 |
| 1-Methylfluoranthene     | 87.6                | 78.2  | 83.2  | 5.10                   | 5.37 | 5.55 |
| Pyrene                   | 224                 | 212   | 218   | 2.00                   | 1.65 | 1.77 |
| Benzo(a)anthracene       | 139                 | 163   | 158   | 4.22                   | 3.65 | 3.66 |
| Chrysene                 | 136                 | 151   | 150   | 4.07                   | 3.17 | 3.90 |
| 1-Methylchrysene         | 294                 | 332   | 320   | 6.73                   | 6.57 | 6.65 |
| 2-Methylchrysene         | 304                 | 332   | 326   | 4.65                   | 4.95 | 4.58 |
| 5-Methylchrysene         | 134                 | 135   | 138   | 4.59                   | 3.85 | 4.37 |
| 4- & 6-Methylchrysene    | 141                 | 146   | 140   | 5.36                   | 5.68 | 5.23 |
| 6-Ethylchrysene          | BDL                 | BDL   | BDL   | BDL                    | BDL  | BDL  |
| Benzo(b)fluoranthene     | 8.08                | 10.6  | 10.2  | 2.11                   | 1.92 | 1.97 |
| Benzo(k)fluoranthene     | 8.76                | 4.74  | 5.34  | BDL                    | BDL  | BDL  |
| Benzo(e)pyrene           | 7.9                 | 7.96  | 7.12  | BDL                    | BDL  | BDL  |
| Benzo(a)pyrene           | 5.16                | 7.04  | 4.98  | BDL                    | BDL  | BDL  |
| Perylene                 | 2.14                | 3.36  | 2.32  | BDL                    | BDL  | BDL  |
| Dibenzo(a,h)anthracene   | 4.36                | 3.88  | 4.12  | BDL                    | BDL  | BDL  |
| Indeno(123-c,d)pyrene    | 2.44                | 4.28  | 5.31  | BDL                    | BDL  | BDL  |
| Benzo(g,h,i)perylene     | 6.84                | 9.00  | 6.32  | BDL                    | BDL  | BDL  |
| $\Sigma_{16}$ EPA-PAHs   | 1540                | 1520  | 1550  | 19.8                   | 16.6 | 18.5 |
| $\Sigma_{25}$ alkyl-PAHs | 9450                | 9000  | 9500  | 123                    | 121  | 112  |
| $\Sigma_{45}$ PAHs       | 11100               | 10600 | 11200 | 143                    | 138  | 131  |

**Table S8** Factor pattern for PAHs in seawater in Dalian.

| PAHs                           | PC1         | PC2         | PC3         | PC4         | PC5         | PC6         |
|--------------------------------|-------------|-------------|-------------|-------------|-------------|-------------|
| Tetrahydronaphthalene          | 0.10        | 0.21        | -0.09       | -0.07       | <b>0.93</b> | 0.03        |
| Naphthalene                    | 0.21        | -0.09       | <b>0.94</b> | -0.11       | 0.15        | 0.00        |
| 1-Methylnaphthalene            | -0.04       | -0.11       | <b>0.98</b> | 0.01        | -0.03       | -0.09       |
| 2-Methylnaphthalene            | -0.04       | -0.11       | <b>0.98</b> | 0.01        | -0.03       | -0.09       |
| 1,4-Dimethylnaphthalene        | 0.67        | <b>0.70</b> | -0.02       | 0.10        | 0.05        | -0.06       |
| 1,3- & 1,7-Dimethylnaphthalene | 0.24        | <b>0.92</b> | -0.08       | 0.00        | 0.17        | -0.04       |
| 2,6- & 2,7-Dimethylnaphthalene | 0.13        | <b>0.94</b> | -0.05       | -0.18       | 0.16        | -0.01       |
| 2,3,5-Trimethylnaphthalene     | 0.48        | <b>0.84</b> | -0.04       | -0.01       | 0.08        | -0.07       |
| 1,4,6,7-Tetramethylnaphthalene | 0.31        | 0.75        | 0.03        | -0.13       | 0.26        | 0.14        |
| 2-Isopropylnaphthalene         | <b>0.96</b> | -0.01       | 0.02        | -0.11       | -0.05       | -0.04       |
| Acenaphthene                   | -0.07       | <b>0.82</b> | -0.10       | 0.01        | -0.17       | -0.18       |
| Fluorene                       | 0.14        | <b>0.94</b> | -0.07       | -0.04       | 0.24        | -0.04       |
| 1-Methylfluorene               | -0.02       | 0.26        | -0.06       | -0.01       | 0.20        | -0.05       |
| 9-Methylfluorene               | <b>0.96</b> | 0.19        | -0.04       | 0.03        | -0.08       | -0.06       |
| 4-Methyldibenzothiophene       | <b>0.88</b> | 0.03        | 0.35        | 0.11        | 0.13        | 0.03        |
| Phenathrene                    | 0.03        | 0.54        | -0.10       | -0.04       | <b>0.77</b> | -0.16       |
| 1-Methylphenanthrene           | <b>0.78</b> | 0.31        | -0.12       | -0.05       | 0.31        | -0.03       |
| 2-Methylphenanthrene           | <b>0.90</b> | -0.30       | 0.02        | 0.04        | -0.07       | -0.10       |
| 3-Methylphenanthrene           | <b>0.98</b> | -0.11       | -0.04       | 0.01        | -0.03       | -0.09       |
| 9-Methylphenanthrene           | <b>0.79</b> | -0.15       | -0.01       | -0.48       | -0.01       | 0.27        |
| Anthracene                     | 0.29        | <b>0.88</b> | -0.04       | 0.02        | 0.17        | -0.12       |
| Fluoranthene                   | 0.08        | -0.10       | -0.04       | 0.31        | 0.21        | 0.66        |
| 1-Methylfluoranthene           | 0.06        | 0.46        | -0.11       | 0.04        | 0.37        | -0.02       |
| Pyrene                         | 0.13        | 0.17        | 0.04        | 0.35        | 0.33        | <b>0.77</b> |
| Benzo(a)anthracene             | 0.00        | 0.18        | -0.15       | -0.18       | -0.07       | <b>0.89</b> |
| Chrysene                       | -0.16       | -0.14       | -0.15       | 0.05        | 0.11        | <b>0.91</b> |
| 1-Methylchrysene               | <b>0.96</b> | 0.15        | -0.09       | 0.02        | 0.03        | -0.05       |
| 2-Methylchrysene               | 0.01        | 0.16        | -0.02       | -0.02       | <b>0.97</b> | 0.02        |
| 4- & 6--Methylchrysene         | 0.07        | 0.39        | 0.00        | 0.03        | <b>0.83</b> | 0.13        |
| 6-Ethylchrysene                | <b>0.88</b> | 0.11        | -0.05       | 0.11        | 0.06        | -0.06       |
| Benzo(b)fluoranthene           | -0.09       | -0.08       | -0.22       | <b>0.87</b> | -0.02       | -0.09       |
| Benzo(k)fluoranthene           | -0.03       | -0.06       | 0.05        | <b>0.89</b> | -0.03       | -0.10       |
| Benzo(e)pyrene                 | -0.20       | -0.28       | -0.12       | 0.23        | 0.03        | 0.57        |
| Benzo(a)pyrene                 | 0.00        | -0.18       | 0.23        | <b>0.79</b> | -0.16       | 0.54        |
| Perylene                       | 0.14        | 0.00        | 0.19        | <b>0.80</b> | 0.09        | 0.31        |
| Explained variance (%)         | 37.9        | 20.4        | 10.8        | 7.8         | 5.0         | 4.0         |

**Table S9** Factor pattern for PAHs in sediment in Dalian.

| PAHs                           | PC1         | PC2         |
|--------------------------------|-------------|-------------|
| Tetrahydronaphthalene          | <b>0.82</b> | 0.29        |
| Naphthalene                    | <b>0.73</b> | 0.63        |
| 1-Methylnaphthalene            | <b>0.88</b> | 0.35        |
| 2-Methylnaphthalene            | <b>0.91</b> | 0.33        |
| 1,4-Dimethylnaphthalene        | <b>0.88</b> | 0.32        |
| 1,3- & 1,7-Dimethylnaphthalene | <b>0.86</b> | 0.45        |
| 2,6- & 2,7-Dimethylnaphthalene | <b>0.82</b> | 0.44        |
| 2,3,5-Trimethylnaphthalene     | <b>0.75</b> | 0.58        |
| 1,4,6,7-Tetramethylnaphthalene | 0.67        | 0.64        |
| 2-Isopropyl naphthalene        | 0.45        | 0.47        |
| Acenaphthylene                 | <b>0.74</b> | 0.60        |
| Acenaphthene                   | <b>0.77</b> | 0.47        |
| Fluorene                       | <b>0.91</b> | 0.36        |
| 1-Methylfluorene               | 0.49        | <b>0.79</b> |
| 9-Methylfluorene               | 0.63        | 0.62        |
| Dibenzothiopene                | 0.32        | <b>0.86</b> |
| 4-Methyldibenzothiophene       | 0.31        | <b>0.87</b> |
| 2,8-Dimethyldibenzothiophene   | 0.25        | <b>0.91</b> |
| Phenanthrene                   | <b>0.84</b> | 0.49        |
| 1-Methylphenanthrene           | 0.55        | <b>0.82</b> |
| 2-Methylphenanthrene           | 0.68        | <b>0.70</b> |
| 3-Methylphenanthrene           | 0.37        | <b>0.73</b> |
| 9-Methylphenanthrene           | 0.63        | <b>0.75</b> |
| Anthracene                     | 0.52        | 0.40        |
| Fluoranthene                   | <b>0.88</b> | 0.45        |
| 1-Methylfluoranthene           | 0.59        | <b>0.79</b> |
| Pyrene                         | <b>0.81</b> | 0.57        |
| Benzo(a)anthracene             | <b>0.90</b> | 0.35        |
| Chrysene                       | <b>0.85</b> | 0.51        |
| 1-Methylchrysene               | 0.09        | <b>0.88</b> |
| 2-Methylchrysene               | 0.63        | <b>0.77</b> |
| 5-Methylchrysene               | 0.61        | <b>0.76</b> |
| 4- & 6--Methylchrysene         | 0.53        | <b>0.83</b> |
| 6-Ethylchrysene                | 0.09        | 0.16        |
| Benzo(b)fluoranthene           | <b>0.87</b> | 0.47        |
| Benzo(k)fluoranthene           | 0.52        | 0.38        |
| Benzo(e)pyrene                 | <b>0.81</b> | 0.57        |
| Benzo(a)pyrene                 | <b>0.85</b> | 0.52        |
| Perylene                       | <b>0.83</b> | 0.51        |
| Dibenzo(a,h)anthracene         | <b>0.81</b> | 0.55        |
| Indeno(123-c,d)pyrene          | <b>0.81</b> | 0.57        |
| Benzo(g,h,i)perylene           | <b>0.73</b> | 0.66        |
| Explained variance (%)         | 70.8        | 18.3        |

## Reference

- 1.Hong, W.J., Jia, H., Ma, W.L., Sinha, R.K., Moon, H.B., Nakata, H., Minh, N.H., Li, W.L., Kannan, K., Sverko, E., Li, Y.F., 2016. Distribution, fate, inhalation exposure and lung cancer risk of atmospheric polycyclic aromatic hydrocarbons in some Asian countries. *Environ. Sci. Technol.* 50, 7163-7174.
- 2.Kim, C.J., Hong, G.H., Kim, H.E., Yang, D.B., 2014. Polycyclic aromatic hydrocarbons (PAHs) in starfish body and bottom sediments in Mohang Harbor (Taean), South Korea. *Environ. Monit. Assess.*, 186, 4343-4356.
- 3.Miki, S., Uno, S., Ito, K., Koyama, J., Tanaka, H., 2014. Distributions of polycyclic aromatic hydrocarbons and alkylated polycyclic aromatic hydrocarbons in Osaka Bay, Japan. *Mar. Pollut. Bull.*, 85, 558-565.
- 4.Planas, C., Puig, A., Rivera, J., Caixach, J., 2006. Analysis of alkyl and 2-6-ringed polycyclic aromatic hydrocarbons by isotope dilution gas chromatography/mass spectrometry Quality assurance and determination in Spanish river sediments. *J. Chromatogr. A*, 1113, 220-230.
- 5.Saha, M., Togo, A., Mizukawa, K., Murakami, M., Takada, H., Zakaria, M.P., Chiem, N.H., Tuyen, B.C., Prudente, M., Boonyatumanond, R., Sarkar, S.K., Bhattacharya, B., Mishra, P., Tana, T.S., 2009. Sources of sedimentary PAHs in tropical Asian waters: Differentiation between pyrogenic and petrogenic sources by alkyl homolog abundance. *Mar. Pollut. Bull.*, 58, 189-200.
- 6.Soliman, Y.S., Al Ansari, E.M.S., Wadec, T.L., 2014. Concentration, composition and sources of PAHs in the coastal sediments of the exclusive economic zone (EEZ) of Qatar, Arabian Gulf. *Mar. Pollut. Bull.*, 85, 542-548.

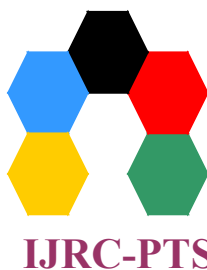

Supplement: Supplementary file 1 [file 14004743]
